# Supplementary material
Source: HighWire-hosted journal article supplement (https://www.qdcxjkg.com/highwire/filestream/113662/field_highwire_adjunct_files/0/supplementary_material_r2.pdf)
Supplement: supplementary_material_r2.pdf [file supplementary_material_r2.pdf]

**Data Supplement**

**SILDENAFIL TO IMPROVE RESPIRATORY REHABILITATION OUTCOMES IN COPD: A CONTROLLED TRIAL**

I. Blanco, S. Santos, J. Gea, R. Güell, F. Torres, E. Gimeno-Santos, D.A. Rodriguez, J. Vilaró, B. Gómez, J Roca and J.A. Barberà

### Supplementary Table 1

#### Baseline characteristics of subjects screened with Doppler echocardiography and evaluated with right heart catheterisation

|                                                                               | Patients screened with Doppler echocardiography<br>n=49 | Patients evaluated with right heart catheterisation<br>n=14 | p-value |
|-------------------------------------------------------------------------------|---------------------------------------------------------|-------------------------------------------------------------|---------|
| Gender, male (%)                                                              | 43 (88%)                                                | 13 (93%)                                                    | 1.000   |
| Age, years                                                                    | 69 (61, 71)                                             | 59 (55, 65)                                                 | 0.006   |
| Body mass index (kg/m <sup>2</sup> )                                          | 25.6 (23.1, 28.4)                                       | 28.6 (24.1, 31.9)                                           | 0.180   |
| Forced vital capacity (FVC), % predicted                                      | 66 (59, 76)                                             | 63 (50, 78)                                                 | 0.645   |
| Forced expiratory volume in the first second (FEV <sub>1</sub> ), % predicted | 30 (24, 35)                                             | 33 (22, 45)                                                 | 0.494   |
| Total lung capacity, % predicted                                              | 115 (105, 129)                                          | 110 (100, 119)                                              | 0.213   |
| Diffusing capacity for carbon monoxide, % predicted                           | 38 (32, 49)                                             | 41 (23, 47)                                                 | 0.974   |
| Partial pressure of arterial oxygen, mmHg                                     | 69 (56, 77)                                             | 63 (58, 72)                                                 | 0.720   |
| Systolic pulmonary artery pressure, mmHg <sup>a</sup>                         | 41 (37, 46)                                             | 36 (34, 40)                                                 | 0.693   |
| Endurance time <sup>b</sup> , seconds                                         | 230 (172, 341)                                          | 260 (203, 331)                                              | 0.527   |
| Maximal exercise tolerance <sup>c</sup> , watts                               | 35.0 (23, 44)                                           | 26.5 (18, 43)                                               | 0.086   |
| Oxygen consumption at peak exercise <sup>c</sup> , mL/min                     | 733 (633, 916)                                          | 863 (596, 1101)                                             | 0.316   |
| Six-minute walk distance, meters                                              | 376 (330, 435)                                          | 403 (360, 455)                                              | 0.475   |
| SGRQ Total score                                                              | 50.3 (40.1, 65.4)                                       | 60.4 (36.9, 66.3)                                           | 0.446   |

<sup>a</sup> Estimated from maximum tricuspid regurgitation velocity measured at Doppler echocardiography, assuming a right atrial systolic pressure of 5 mmHg.

<sup>b</sup> In the constant work-rate exercise test

<sup>c</sup>: In the incremental cardiopulmonary exercise test

Values are given as median (percentile 25, percentile 75) or n (%).

**Supplementary Table 2****Characteristics of the subjects who were studied by right heart catheterisation (baseline)**

|                                                                                  | Sildenafil<br>n=9 | Placebo<br>n=5    | p-value |
|----------------------------------------------------------------------------------|-------------------|-------------------|---------|
| Gender, male (%)                                                                 | 8 (89%)           | 5 (100%)          |         |
| Age, years                                                                       | 60 (55, 65)       | 58 (56, 60)       | 0.8425  |
| Body mass index (kg/m <sup>2</sup> )                                             | 28.2 (23.7, 30.1) | 29.1 (26.3, 31.9) | 0.696   |
| Forced vital capacity (FVC),<br>% predicted                                      | 61 (44, 78)       | 71 (56, 74)       | 0.558   |
| Forced expiratory volume in the<br>first second (FEV <sub>1</sub> ), % predicted | 27 (22, 45)       | 37 (32, 44)       | 0.558   |
| FEV <sub>1</sub> /FVC                                                            | 0.46 (0.33, 0.47) | 0.40 (0.33, 0.51) | 1.000   |
| Total lung capacity,<br>% predicted                                              | 108 (100, 117)    | 117 (105, 122)    | 0.648   |
| Diffusing capacity for carbon<br>monoxide, % predicted                           | 38 (23, 46)       | 43 (42, 47)       | 0.251   |
| Partial pressure of arterial<br>oxygen, mmHg                                     | 62 (58, 67)       | 64 (63, 72)       | 0.794   |
| Mean pulmonary artery pressure,<br>mmHg                                          | 31 (29, 33)       | 26 (26, 27)       | 0.0834  |
| Mean pulmonary capillary wedge<br>pressure, mmHg                                 | 9 (6, 13)         | 13 (11, 13)       | 0.558   |
| Mean right atrial pressure,<br>mmHg                                              | 5 (5, 8)          | 6 (5, 6)          | 1.000   |
| Cardiac index, L/min/m <sup>2</sup>                                              | 2.53 (2.39, 3.17) | 2.98 (2.4, 3.05)  | 1.000   |
| Endurance time <sup>a</sup> , seconds                                            | 268 (203, 307)    | 252 (221, 460)    | 0.517   |
| Maximal exercise tolerance <sup>b</sup> ,<br>watts                               | 18 (18, 32)       | 29 (28, 33)       | 0.203   |
| Oxygen consumption at peak<br>exercise <sup>b</sup> , mL/min                     | 40 (32, 47)       | 41 (41, 49)       | 0.334   |
| Six-minute walk distance, meters                                                 | 374 (359, 400)    | 455 (408, 485)    | 0.041   |
| SGRQ Total score                                                                 | 61.2 (51.5, 66.3) | 59.6 (36.9, 63.3) | 0.896   |

<sup>a</sup>: In the constant work-rate exercise test

<sup>b</sup>: In the incremental cardiopulmonary exercise test

Values are given as median (percentile 25, percentile 75) or n (%)

### Supplementary Table 3

#### Effects of sildenafil in combination with pulmonary rehabilitation on efficacy outcomes in subjects studied by right heart catheterisation

|                                                           |            | Baseline              | Change from baseline    | Sildenafil - Placebo<br>Change differences |
|-----------------------------------------------------------|------------|-----------------------|-------------------------|--------------------------------------------|
| <b>Primary outcome</b>                                    |            |                       |                         |                                            |
| Endurance time <sup>a</sup> , seconds                     | Sildenafil | 268 [175 to 331]      | 149 [51 to 589]         | -241 [-1132 to 277]                        |
|                                                           | Placebo    | 252 [188 to 546]      | 485 [0 to 1650]         |                                            |
| <b>Secondary outcomes</b>                                 |            |                       |                         |                                            |
| Maximal exercise tolerance <sup>b</sup> , watts           | Sildenafil | 29 [13 to 59]         | 7 [-2 to 12]            | 0 [-10 to 18]                              |
|                                                           | Placebo    | 46 [40 to 71]         | 4 [-2 to 28]            |                                            |
| Oxygen consumption at peak exercise <sup>b</sup> , mL/min | Sildenafil | 844 [423 to 1169]     | 82 [-57 to 249]         | 95 [-96 to 306]                            |
|                                                           | Placebo    | 924 [841 to 1110]     | -57 [-59 to 330]        |                                            |
| Six-minute walk distance, meters                          | Sildenafil | 374 [325 to 437]      | 31 [-12 to 51]          | 10 [-43 to 33]                             |
|                                                           | Placebo    | 455 [406 to 495]      | 21 [-12 to 34]          |                                            |
| SGRQ Total score                                          | Sildenafil | 61.2 [32.66 to 77.75] | -3.98 [-14.31 to 19.18] | 0.2 [-19.58 to 19.84]                      |
|                                                           | Placebo    | 59.6 [32.52 to 81.58] | -2.42 [-12.44 to 0.67]  |                                            |
| SF-36 Aggregate physical score                            | Sildenafil | 20.0 [5.0 to 25.0]    | 12.5 [0.0 to 70.0]      | 7.5 [-10.0 to 55.0]                        |
|                                                           | Placebo    | 55.0 [15.0 to 65.0]   | 7.5 [-5.0 to 15.0]      |                                            |
| SF-36 Aggregate mental score                              | Sildenafil | 72.0 [16.0 to 76.0]   | 0.0 [-12.0 to 36.0]     | -8 [-48.0 to 36.0]                         |
|                                                           | Placebo    | 68.0 [36.0 to 100.0]  | 10.0 [-24.0 to 40.0]    |                                            |

Values are median and [95% CI]. Sample sizes are n=9 and n=5 for Sildenafil and Placebo, respectively. Results are based on the imputed data using the 10<sup>th</sup> percentile to impute, except for SGRQ where the 90<sup>th</sup> percentile was used instead.

<sup>a</sup>: In the constant work-rate exercise test

<sup>b</sup>: In the incremental cardiopulmonary exercise test

*Definition of abbreviations:* SGRQ: St George Respiratory Questionnaire; SF-36: Medical Outcomes Study 36-Item Short Form Health Survey.
